# Supplementary material
Source: PubMed Central journal article supplement (PMC4579855)
Supplement: ncomms9266-s1.pdf [file ncomms9266-s1.pdf]

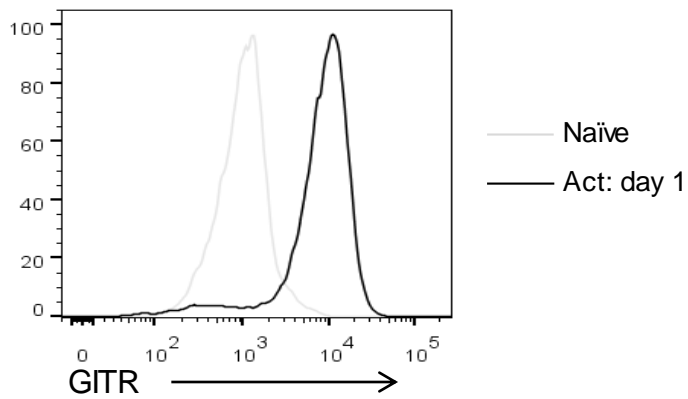

**Supplementary Fig 1. GITR expression by naïve and activated CD4+ T cells**

Naïve CD4+ T cells were activated with anti-CD3 plus APCs for 24 hrs (Act: day 1); expression of GITR on the cell surface was analyzed by flow cytometry and compared with naïve unstimulated CD4+ T cells (Naïve).

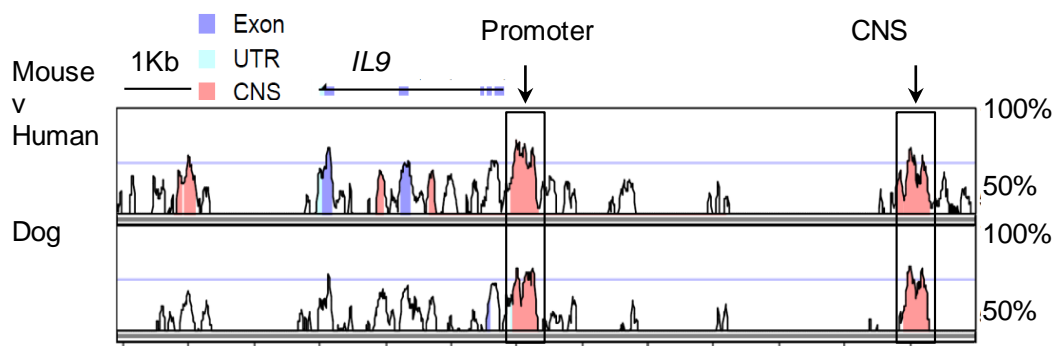

**Supplementary Fig 2. Schematic plot of the *IL9* gene locus indicating the intron–exon, promoter, and conserved non-coding regions.**

VISTA schematic plot showing sequence similarity of conserved non-coding sequence (CNS) sites (pink) between mouse *IL9* vs human and dog *IL9* DNA, presented relative to their positions in the mouse genome (horizontal axis). The promoter and CNS regions are located at  $-1$  b and  $-6$  kb, respectively, from the transcriptional starting site of the mouse *IL9*.

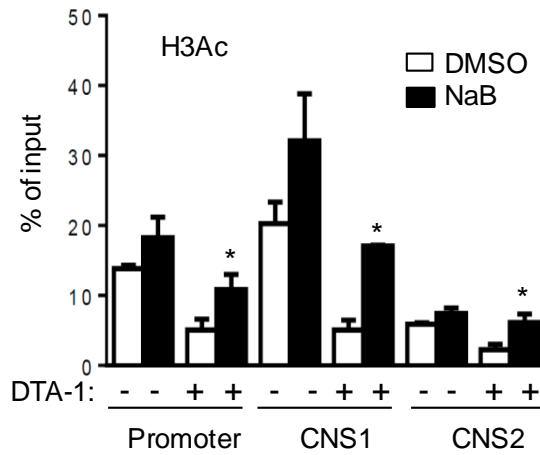

**Supplementary Fig 3. The HDAC inhibitor sodium butyrate prevents GITR-mediated hypo-acetylation of *Foxp3* locus**

ChIP analysis of H3 acetylation status of *Foxp3* locus, including the promoter, CNS1, and CNS2 regions in naive CD4+ T cells activated under iTreg-polarizing conditions and GITR ligation in the presence or absence of HDAC inhibitor sodium butyrate (NaB, 250µg/ml) for 2 days. Data are representative of two independent experiments. \* p < 0.05.

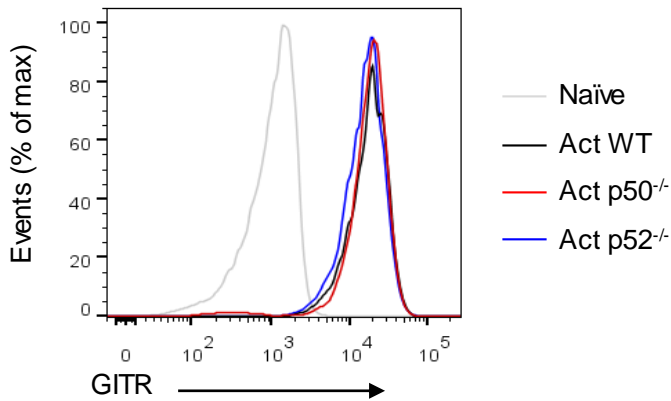

**Supplementary Fig 4. Wt B6, p50<sup>-/-</sup>, and p52<sup>-/-</sup> CD4<sup>+</sup> T cells express similar levels of GITR on the cell surface upon activation**

GITR expression by Wt, p50<sup>-/-</sup> and p52<sup>-/-</sup> CD4<sup>+</sup> T cells, left unstimulated (Naïve; resting cells) or activated for 2 days under iTreg-polarizing conditions (Act) was analyzed by flow cytometry and shown. Similar patterns were observed on day 3 and day 4 following activation

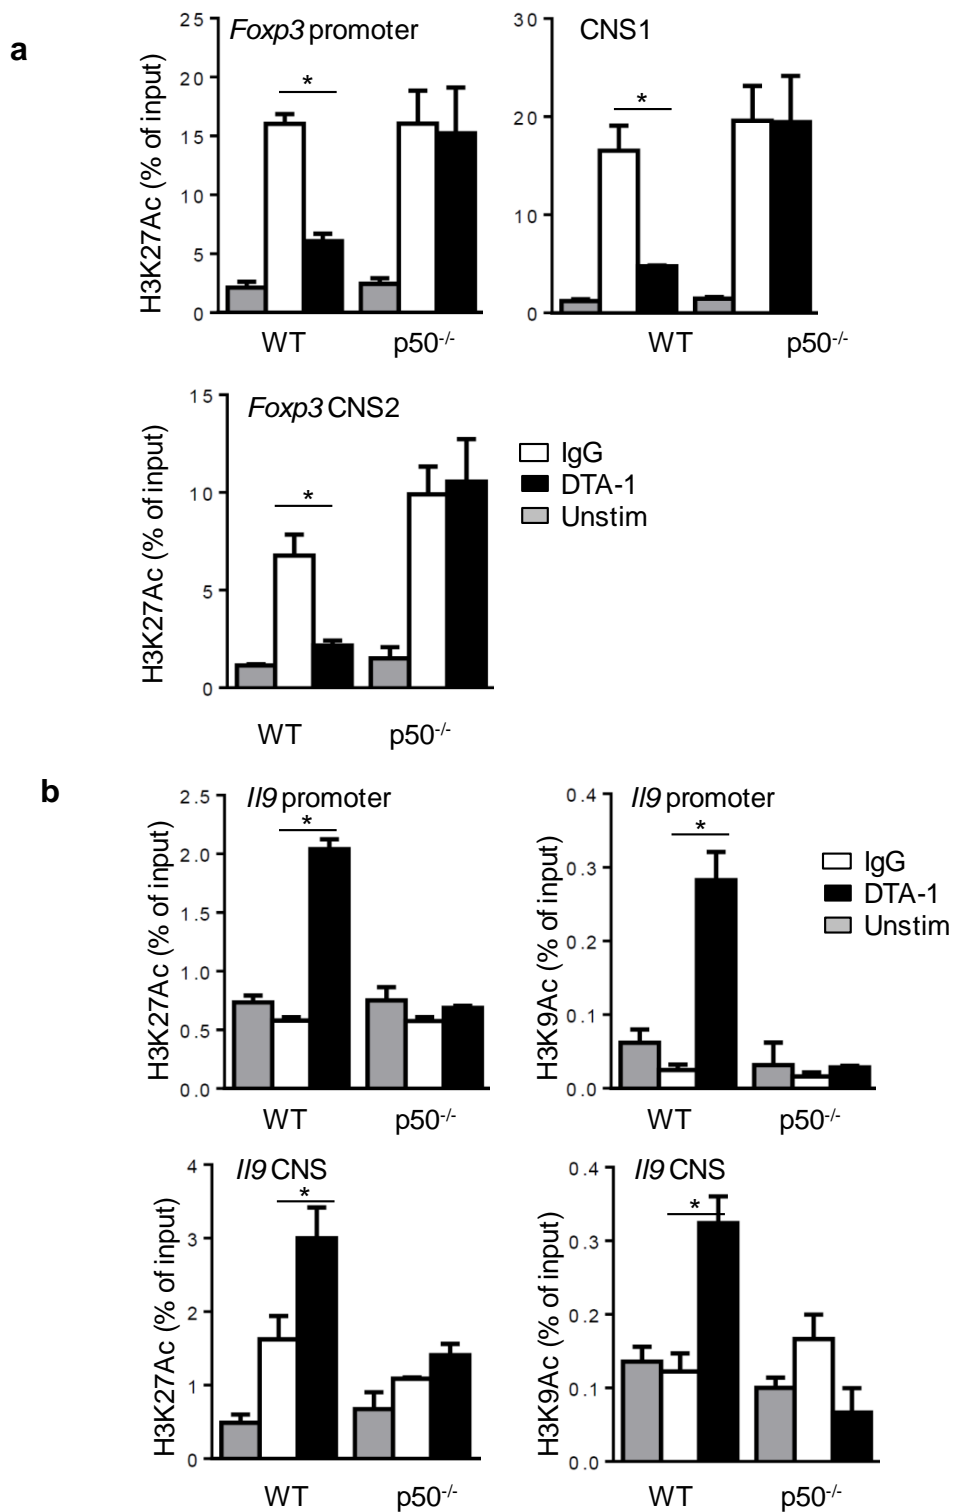

**Supplementary Fig 5. GITR-induced differential chromatin remodeling responses at the *Foxp3* and *Il9* loci require p50.**

ChIP analysis of H3K27Ac and H3K9Ac modifications at *Foxp3* (a) and *Il9* (b) promoter and CNS regions from Wt B6 and p50<sup>-/-</sup> CD4<sup>+</sup> T cells activated under iTreg-polarizing conditions for 2 days in the presence of DTA-1 or Ctrl IgG. Data are representative of two independent experiments.

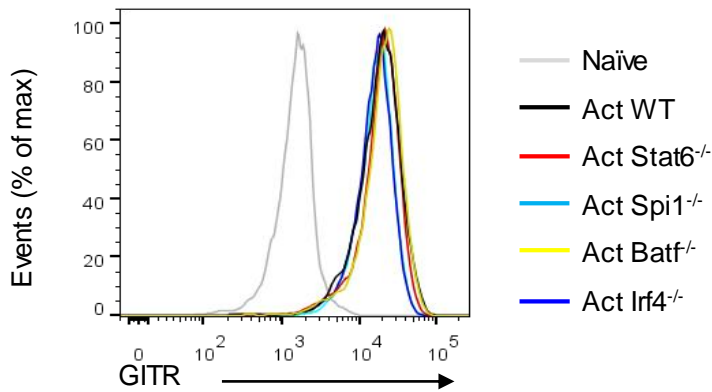

**Supplementary Fig 6. Wt B6, Spi1<sup>-/-</sup>, Batf<sup>-/-</sup>, IRF4<sup>-/-</sup> and Stat6<sup>-/-</sup> CD4<sup>+</sup> T cells express similar levels of GITR on the cell surface upon activation**

GITR expression by CD4<sup>+</sup> T cells from Wt B6, Spi1<sup>-/-</sup>, Batf<sup>-/-</sup>, IRF4<sup>-/-</sup> and Stat6<sup>-/-</sup> mice, either left unstimulated (Naïve; resting cells) or activated for 2 days under iTreg-polarizing conditions (Act), was analyzed by flow cytometry and shown. Similar patterns were observed on day 3 and day 4 following activation.

**Fig. 2A**

Cytosol

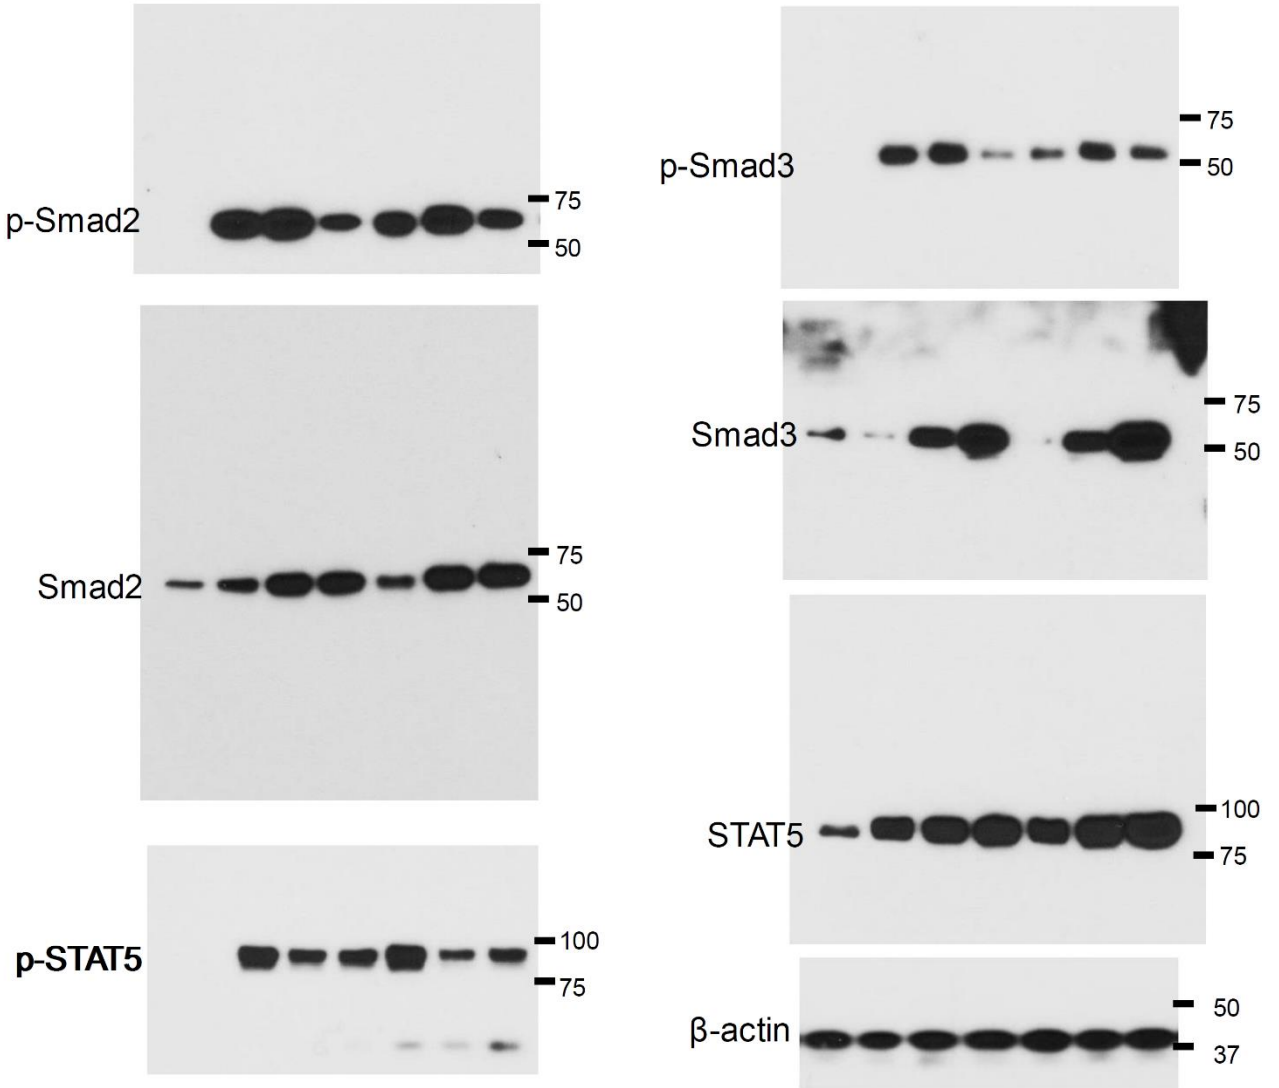

Nucleus

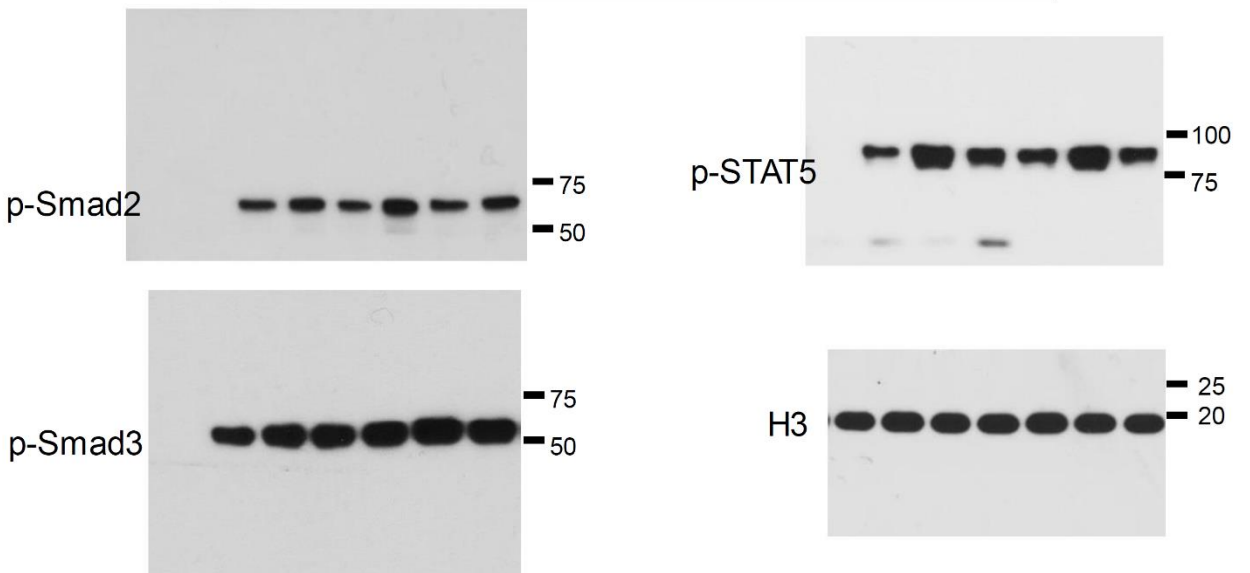

**Supplementary Fig 7. Immunoblots (1)**

**Fig. 3A**

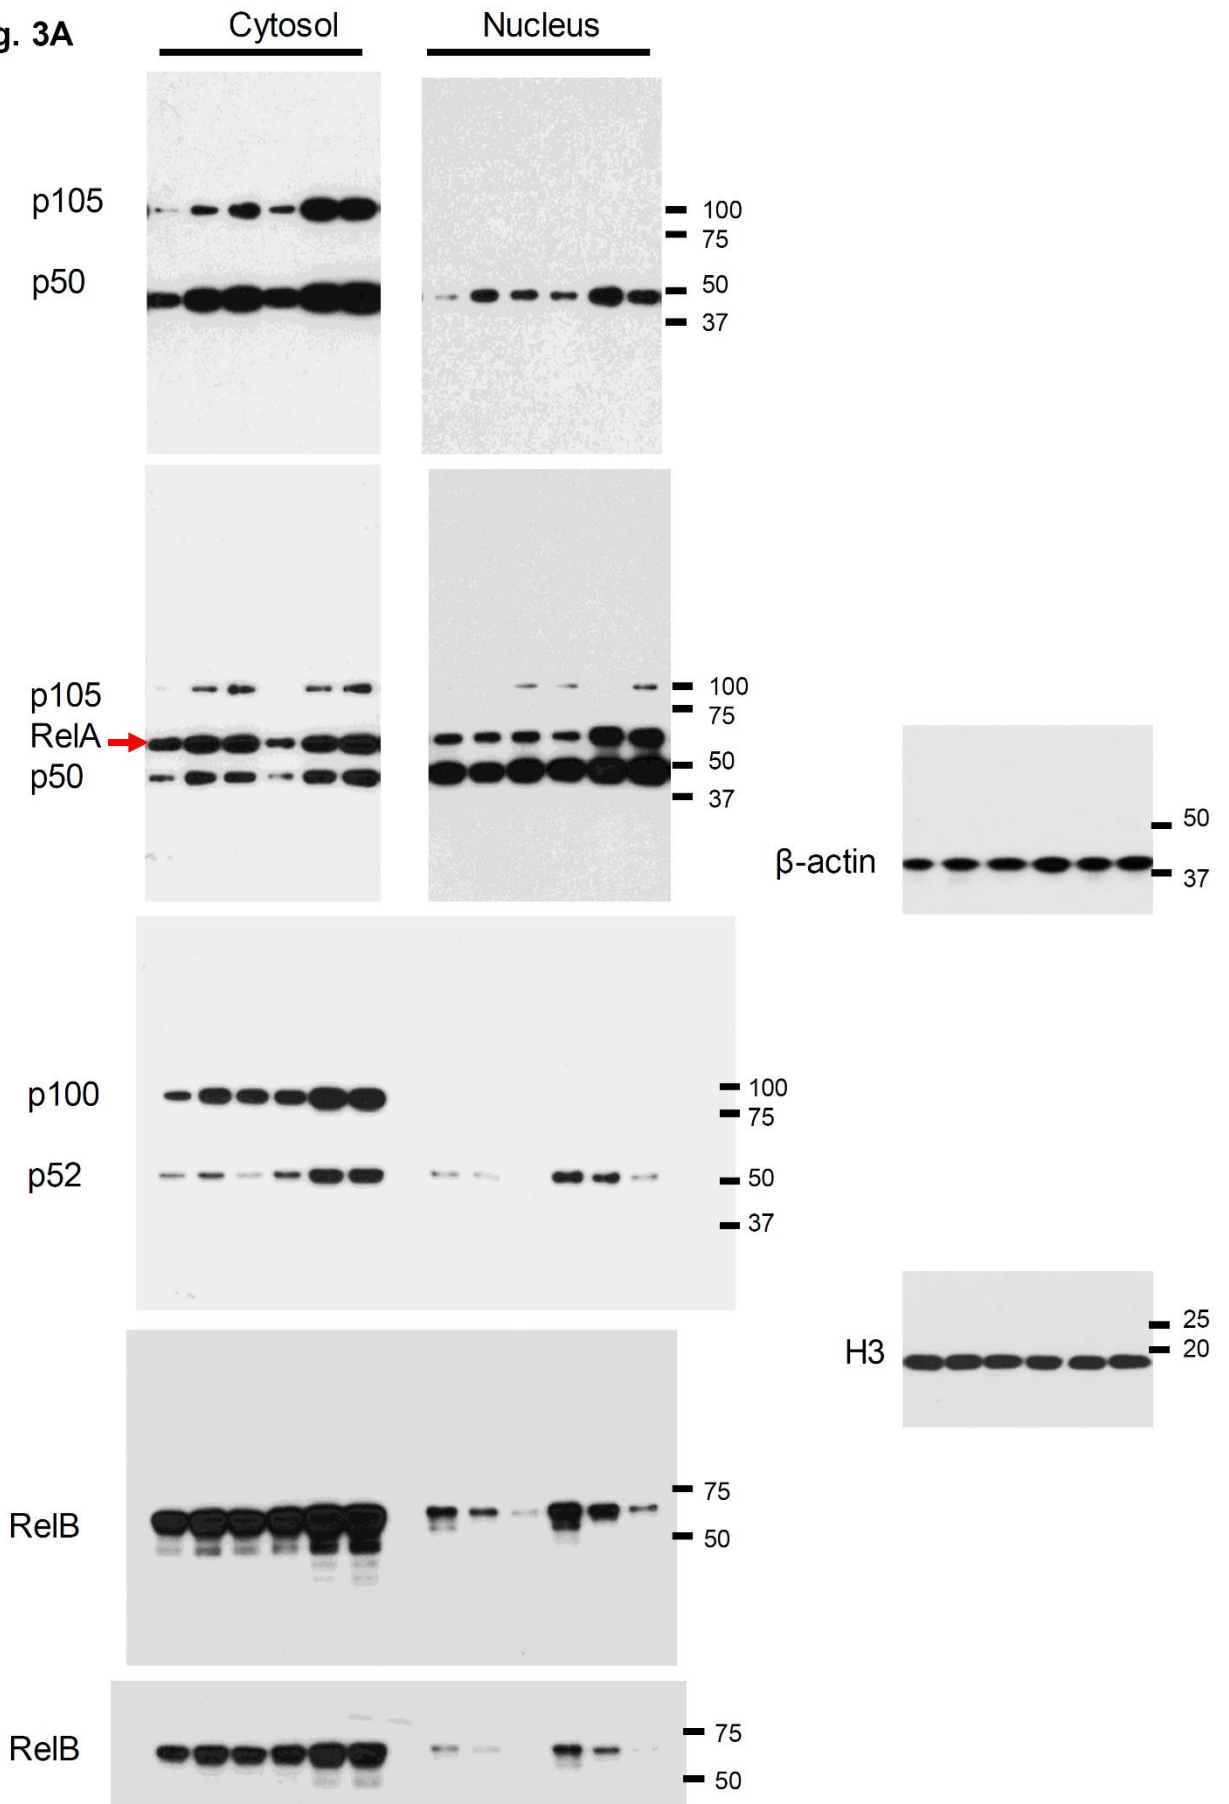

**Supplementary Fig 7. Immunoblots (2)**



Fig. 4C

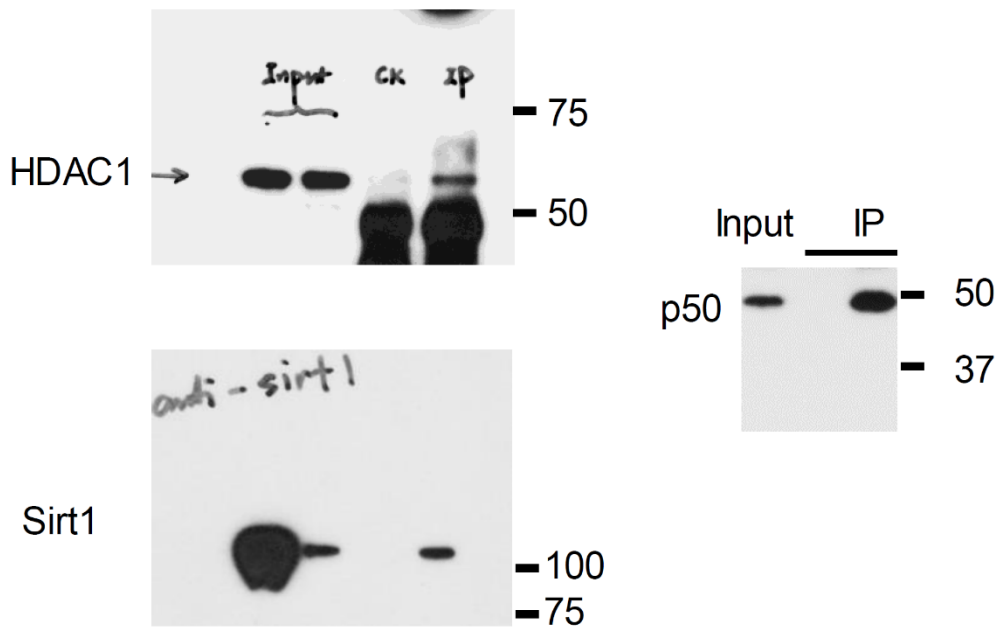

Fig. 5E

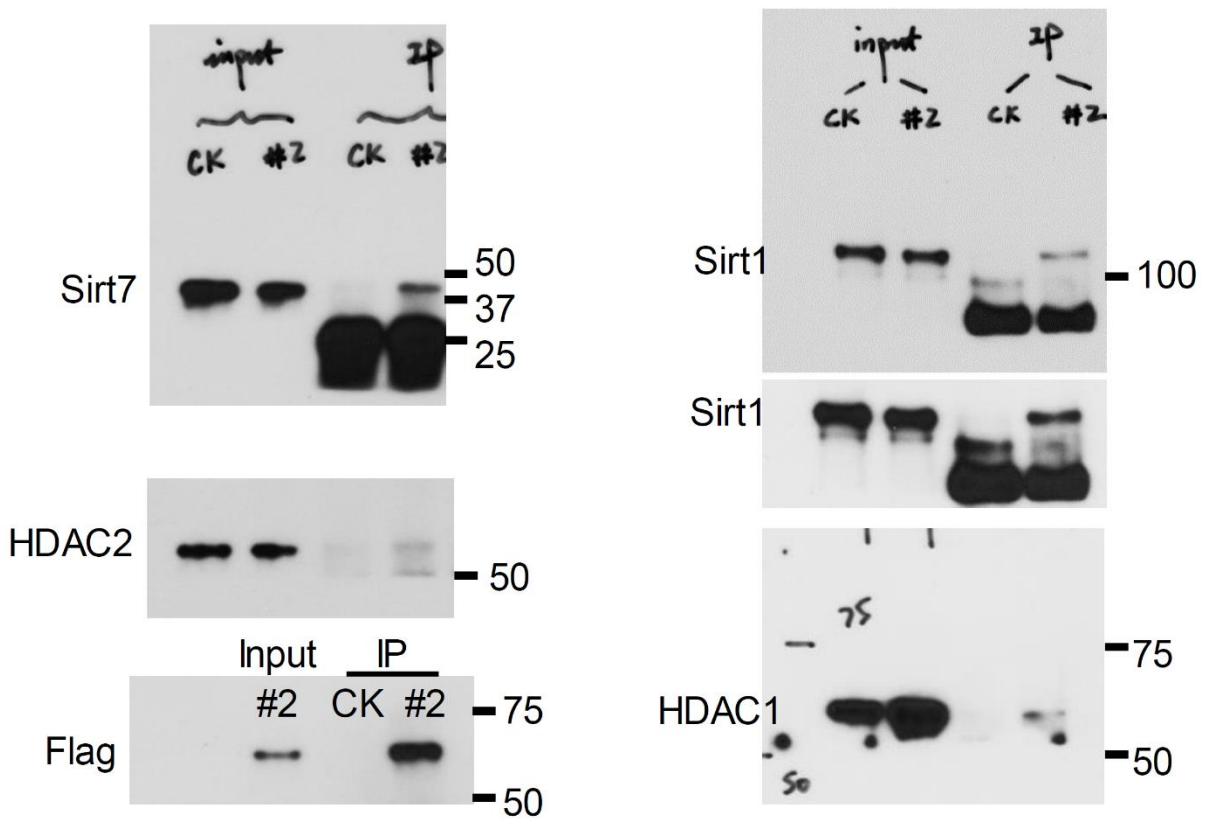

Supplementary Fig 7. Immunoblots (3)

**Fig. 6A**

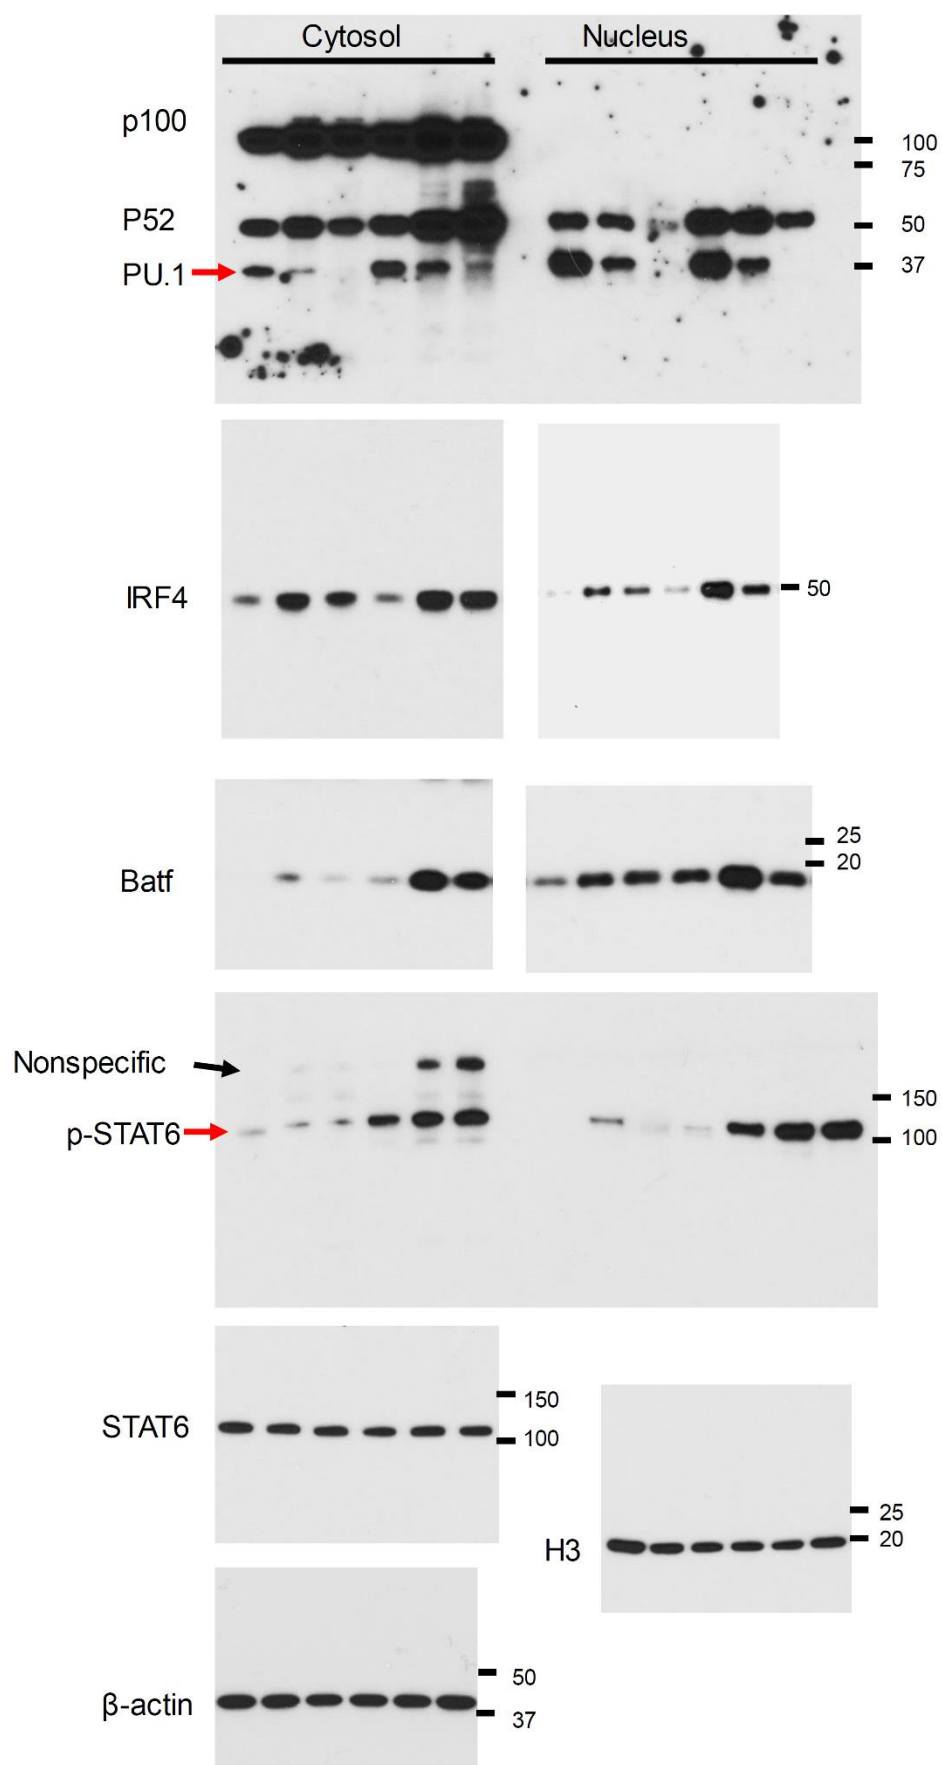

**Supplementary Fig 7. Immunoblots (4)**

**Fig. 6C**

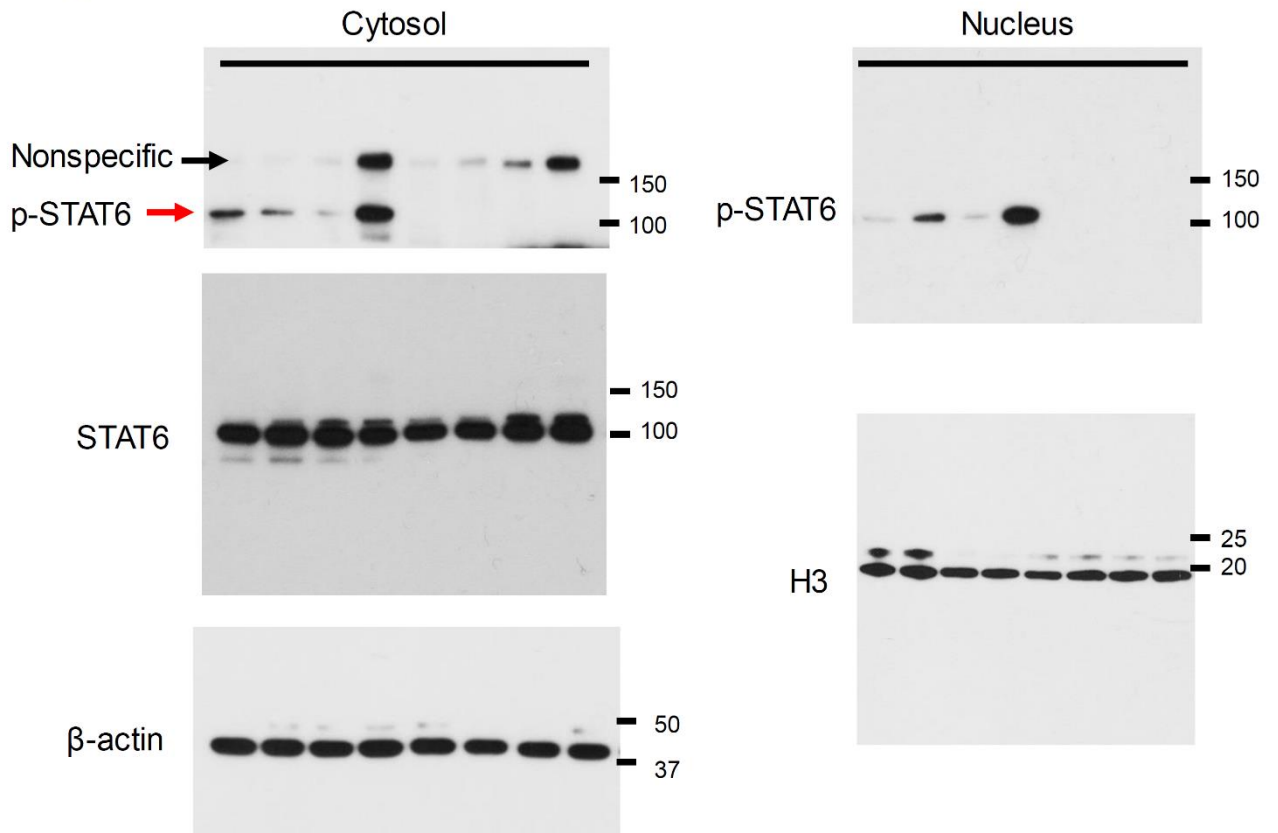

**Fig. 7D**

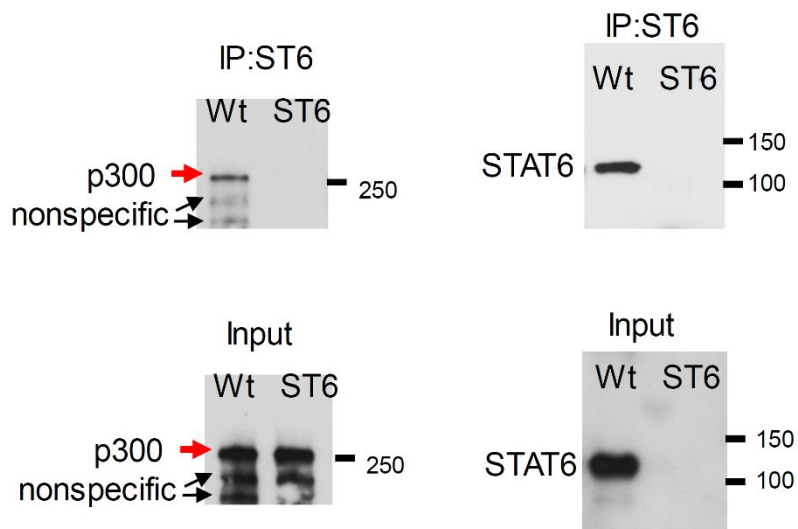

**Supplementary Table 1. Real-time PCR Primers for figure 8**

| Gene Name | Catalogue # (Applied Biosystems) |
|-----------|----------------------------------|
| Gapdh     | 4352339E                         |
| Foxp3     | Mm00475162_m1                    |
| Il9       | Mm00434305_m1                    |
| Il17a     | Mm00439618_m1                    |
| Ifng      | Mm01168134_m1                    |
| Il4       | Mm00445259_m1                    |

**Supplementary Table 2. Real-time PCR Primers for ChIP assays.**

| Primer Name                     | Primer Sequence                 |
|---------------------------------|---------------------------------|
| Foxp3_promoter_forward          | CTGAGGTTTGGAGCAGAAGGA           |
| Foxp3_promoter_reverse          | TCTGAAGCCTGCCATGTGAA            |
| Foxp3_CNS1_forward              | ACTTAGTTTATGAGCATGCATGTTCTTC    |
| Foxp3_CNS1_reverse              | TGAGATCCCACACCATCTTCTG          |
| Foxp3_CNS2_forward              | GTTGCCGATGAAGCCCAAT             |
| Foxp3_CNS2_reverse              | ATCTGGGCCCTGTTGTCACA            |
| Foxp3_promoter_kB site_forward  | CTGGCGAAAGTGGCAGAG              |
| Foxp3_promoter_kB site_reverse  | CTGGCATTTAGGATGAATGGTATTAG      |
| Foxp3_CNS1_kB site_forward      | ATTTACCCCAGCCACGAGAC            |
| Foxp3_CNS1_kB site_reverse      | ACTCTGACACAACATCTCTGTGAGG       |
| Foxp3_CNS2_kB site_forward      | CCCCGATAGGAAAACATATTCTATGT      |
| Foxp3_CNS2_kB site_reverse      | AGCCAGCTTCCTGCACTGT             |
| Foxp3_CNS1_Smad3 site_forward   | CCC ATGTTG CTTCCAGTCTCCTTTAT GG |
| Foxp3_CNS1_Smad3 site_reverse   | AGGTACAGAGAGGTTAAGAGCCTGGGT     |
| Il9_promoter_forward            | TTCTCACTAATGTGGAGGGGA           |
| Il9_promoter_reverse            | GTCGGGTTCTGAAATACTAAAGG         |
| Il9_CNS_forward                 | GTGCTGAAGGATTCTTGAA             |
| Il9_CNS_reverse                 | ACAAAATGACCCCCAAAATT            |
| Il9_promoter_foxp3 site_forward | TTCTCACTAATGTGGAGGGGA           |
| Il9_promoter_foxp3 site_reverse | GTCGGGTTCTGAAATACTAAAGG         |
| Il9_CNS_foxp3 site_forward      | GGGGTCATTTTGTGTTGTGAC           |
| Il9_CNS_foxp3 site_reverse      | TTGTTCCAAAGATAAAGCTCCAC         |
| Il9_Smad3 site_forward          | CTCAATTGGCCTCAACTTACAG          |
| Il9_Smad3 site_reverse          | GAACTCAGTCTACCAGCATCTTC         |
| Il9_Promoter_STAT6 site_forward | GAACCCGACTATTTGAAGAGC           |
| Il9_Promoter_STAT6 site_reverse | TTTTTTCTCTGTAAGTTGAGGCC         |
| Il9_CNS_STAT6 site_forward      | CACTAGGCTTTTAATCACAACTAAGTG     |
| Il9_CNS_STAT6 site_reverse      | TGCAGATACTATCTTTTGAATAAATG      |
